# Supplementary material
Source: PubMed Central journal article supplement (PMC9293955)
Supplement: mmc1.pdf [file mmc1.pdf]

## Supplemental information

### **Immunodeficiency syndromes differentially impact the functional profile of SARS-CoV-2-specific T cells elicited by mRNA vaccination**

**Yu Gao, Curtis Cai, David Wullimann, Julia Niessl, Olga Rivera-Ballesteros, Puran Chen, Joshua Lange, Angelica Cuapio, Ola Blennow, Lotta Hansson, Stephan Mielke, Piotr Nowak, Jan Vesterbacka, Mira Akber, Andre Perez-Potti, Takuya Sekine, Thomas R. Müller, Caroline Boulouis, Tobias Kammann, Tiphaine Parrot, Jagadeeswara Rao Muvva, Michal Sobkowiak, Katie Healy, Gordana Bogdanovic, Sandra Muschiol, Gunnar Söderdahl, Anders Österborg, Fredrika Hellgren, Alba Grifoni, Daniela Weiskopf, Alessandro Sette, Karin Loré, Margaret Sällberg Chen, Per Ljungman, Johan K. Sandberg, C.I. Edvard Smith, Peter Bergman, Hans-Gustaf Ljunggren, Soo Aleman, and Marcus Buggert**

**Figure S1**

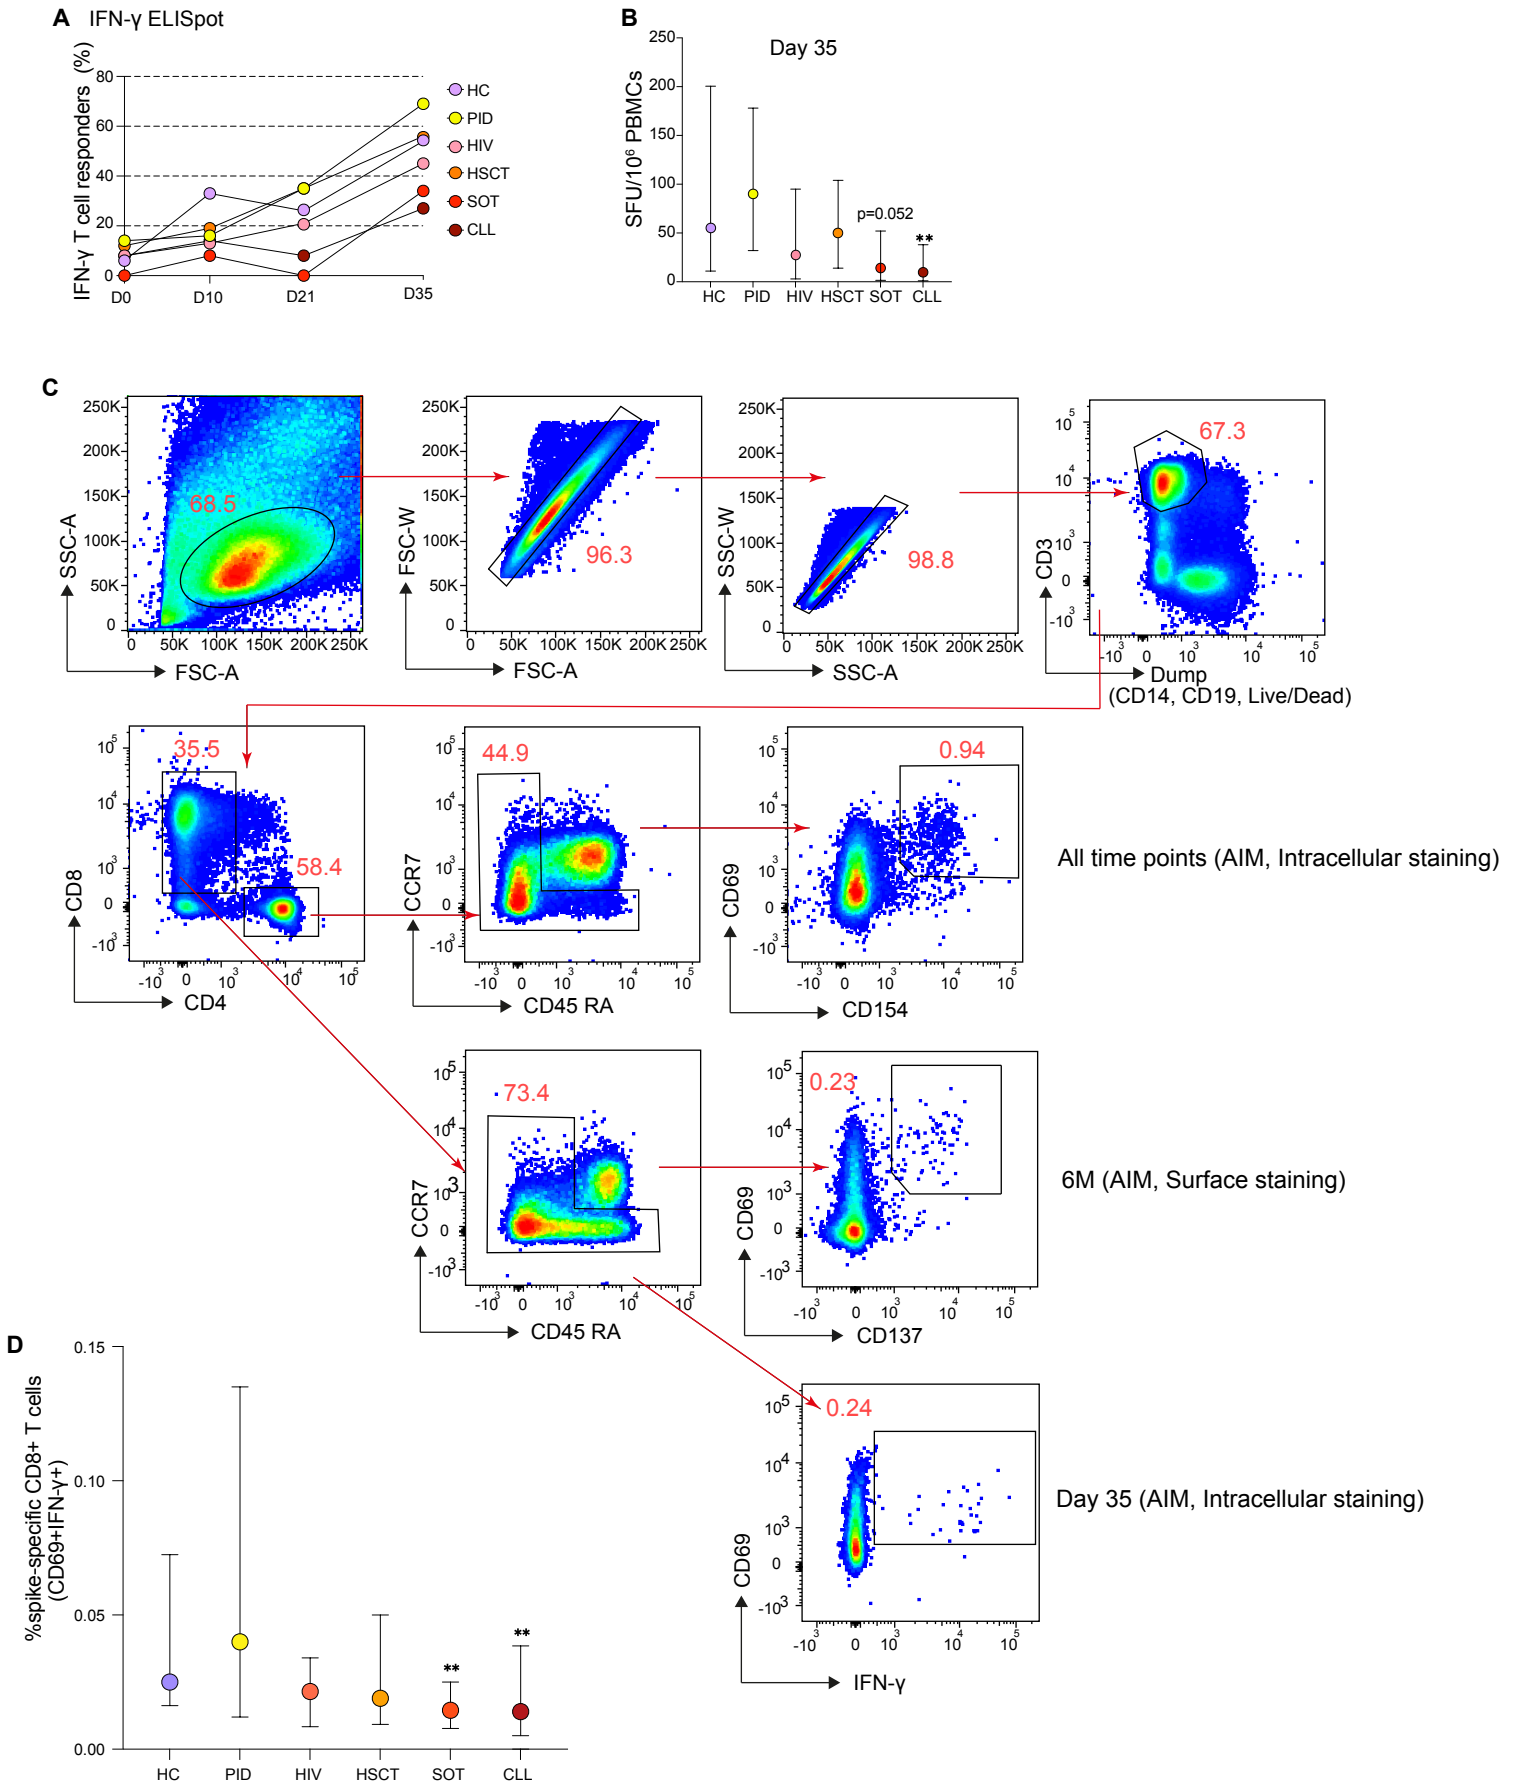

**Figure S1. Longitudinally evolution of total T cell responses and gating strategy for identifying spike-specific T cells, Related to Figure 1.** (A) Plot of the frequency of individuals with detectable IFN- $\gamma$  T cell responses (ELISpot assay). (B) Magnitude of IFN- $\gamma$  ELISpot T cell responses at Day 35. (C) Gating strategy for the identification of memory (non CD45RA<sup>+</sup>CCR7<sup>+</sup>) spike-specific T cells in the CD4<sup>+</sup> (CD154<sup>+</sup>CD69<sup>+</sup>) and CD8<sup>+</sup> compartments (CD69<sup>+</sup>CD137<sup>+</sup> for 6M and CD69<sup>+</sup>IFN- $\gamma$ <sup>+</sup> for Day 35) after spike peptide stimulation. Numbers indicate percentages in the drawn gates. (D) Spike-specific (CD69<sup>+</sup>IFN $\gamma$ <sup>+</sup>) CD8<sup>+</sup> T cell frequencies at Day 35. Graph shows median  $\pm$  IQR and Kruskal-Wallis test with Dunn's post test. Mann-Whitney test. \* P< 0.05, \*\* P< 0.01, \*\*\* P< 0.001.

**Figure S2**

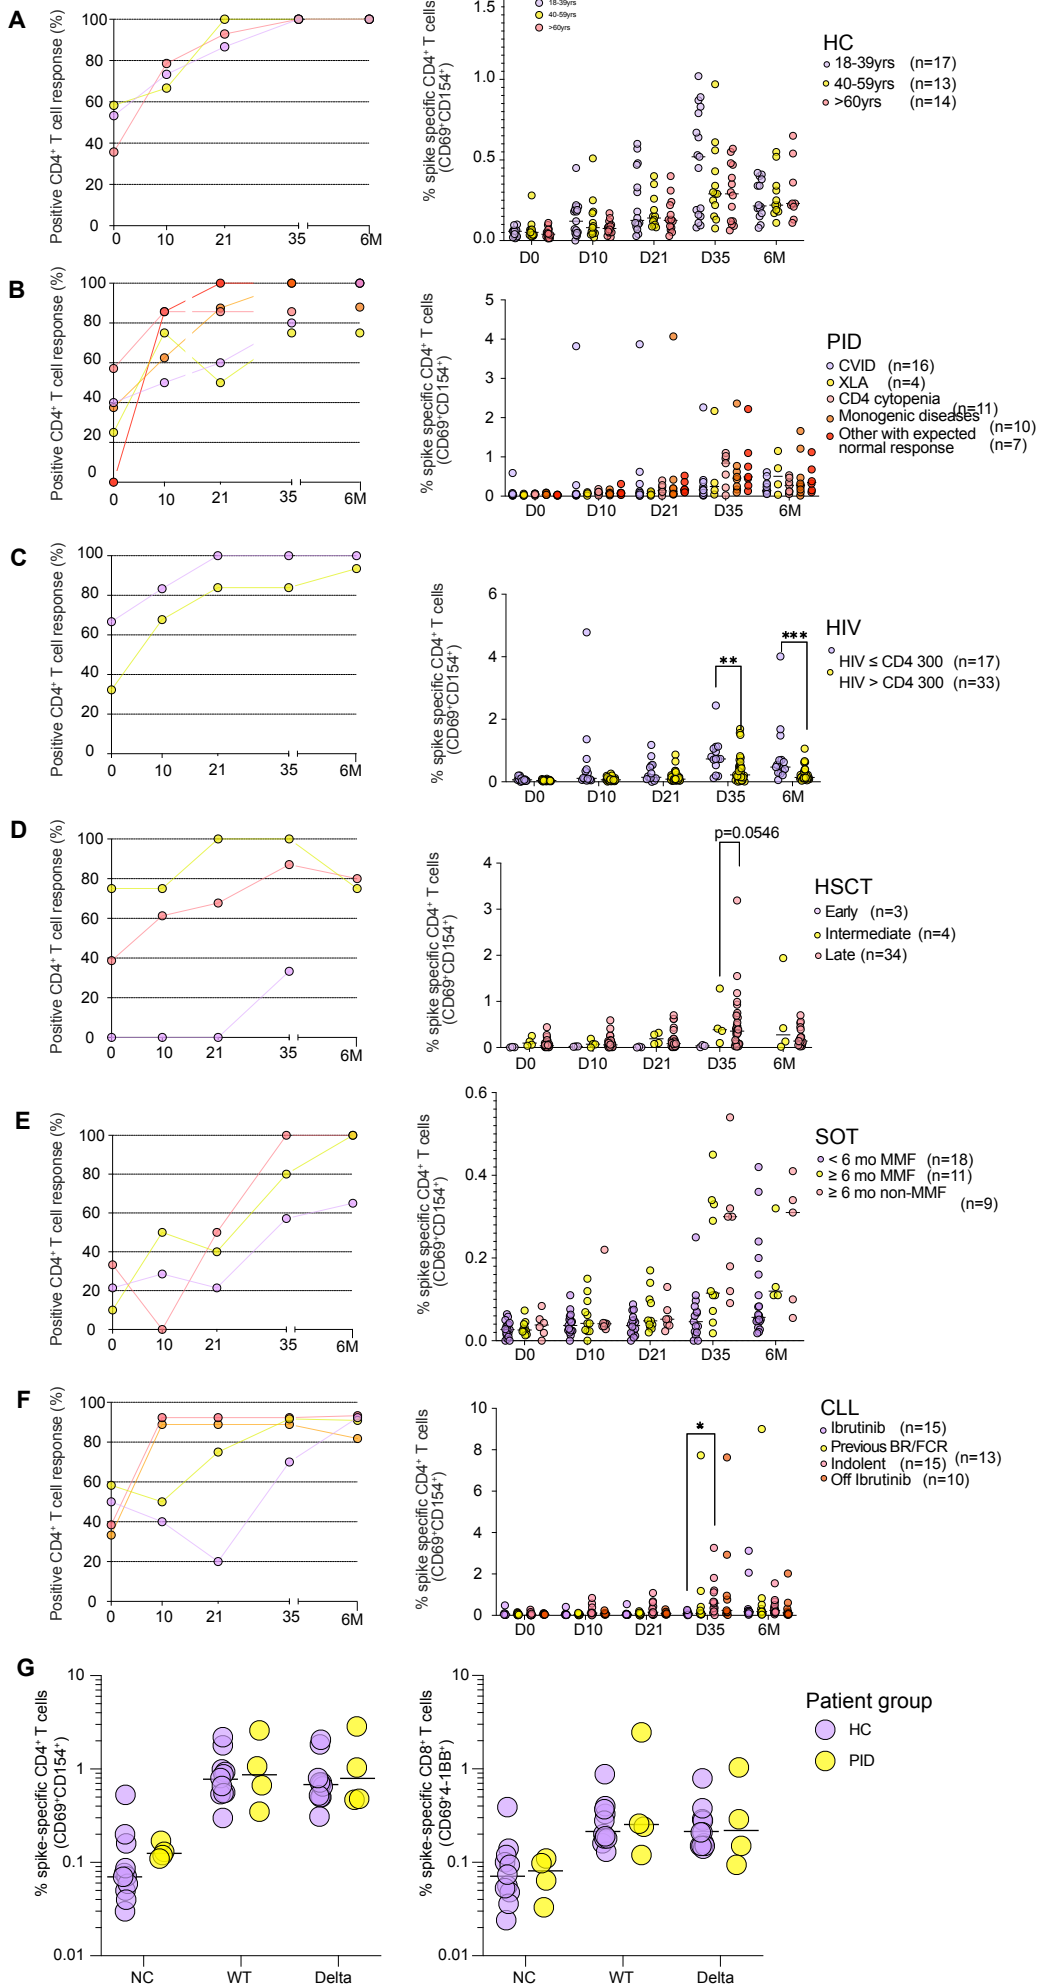

**Figure S2. Subgroups of immunodeficient cohorts display differential T cell response rates, but maintain cross-variant recognition, Related to Figure 1.** Longitudinal plots of the median proportion of individuals with detectable ( $\geq 0.05\%$ ) spike-specific CD4<sup>+</sup> T cell responses segregated within-cohort subgroups for healthy controls (A), patients with PID (B), HIV (C), HSCT (D), SOT (E), and CLL (F). (G) Frequencies of spike-specific T cell responses to stimulation from wildtype and Delta variant peptide pools for HC and PID cohorts. Graphs show median values. Mann-Whitney test for comparison between two groups and Kruskal-Wallis test with Dunn's post test for comparisons between three or more groups. \*P < 0.05, \*\*P < 0.01, \*\*\*P < 0.001, \*\*\*\*P < 0.0001. CIVD: Common variable immunodeficiency, XLA: X-linked agammaglobulinemia, MMF: Mycophenolate mofetil, BR/FCR: bendamustine and rituximab/ fludarabine, cyclophosphamide and rituximab

**Figure S3**

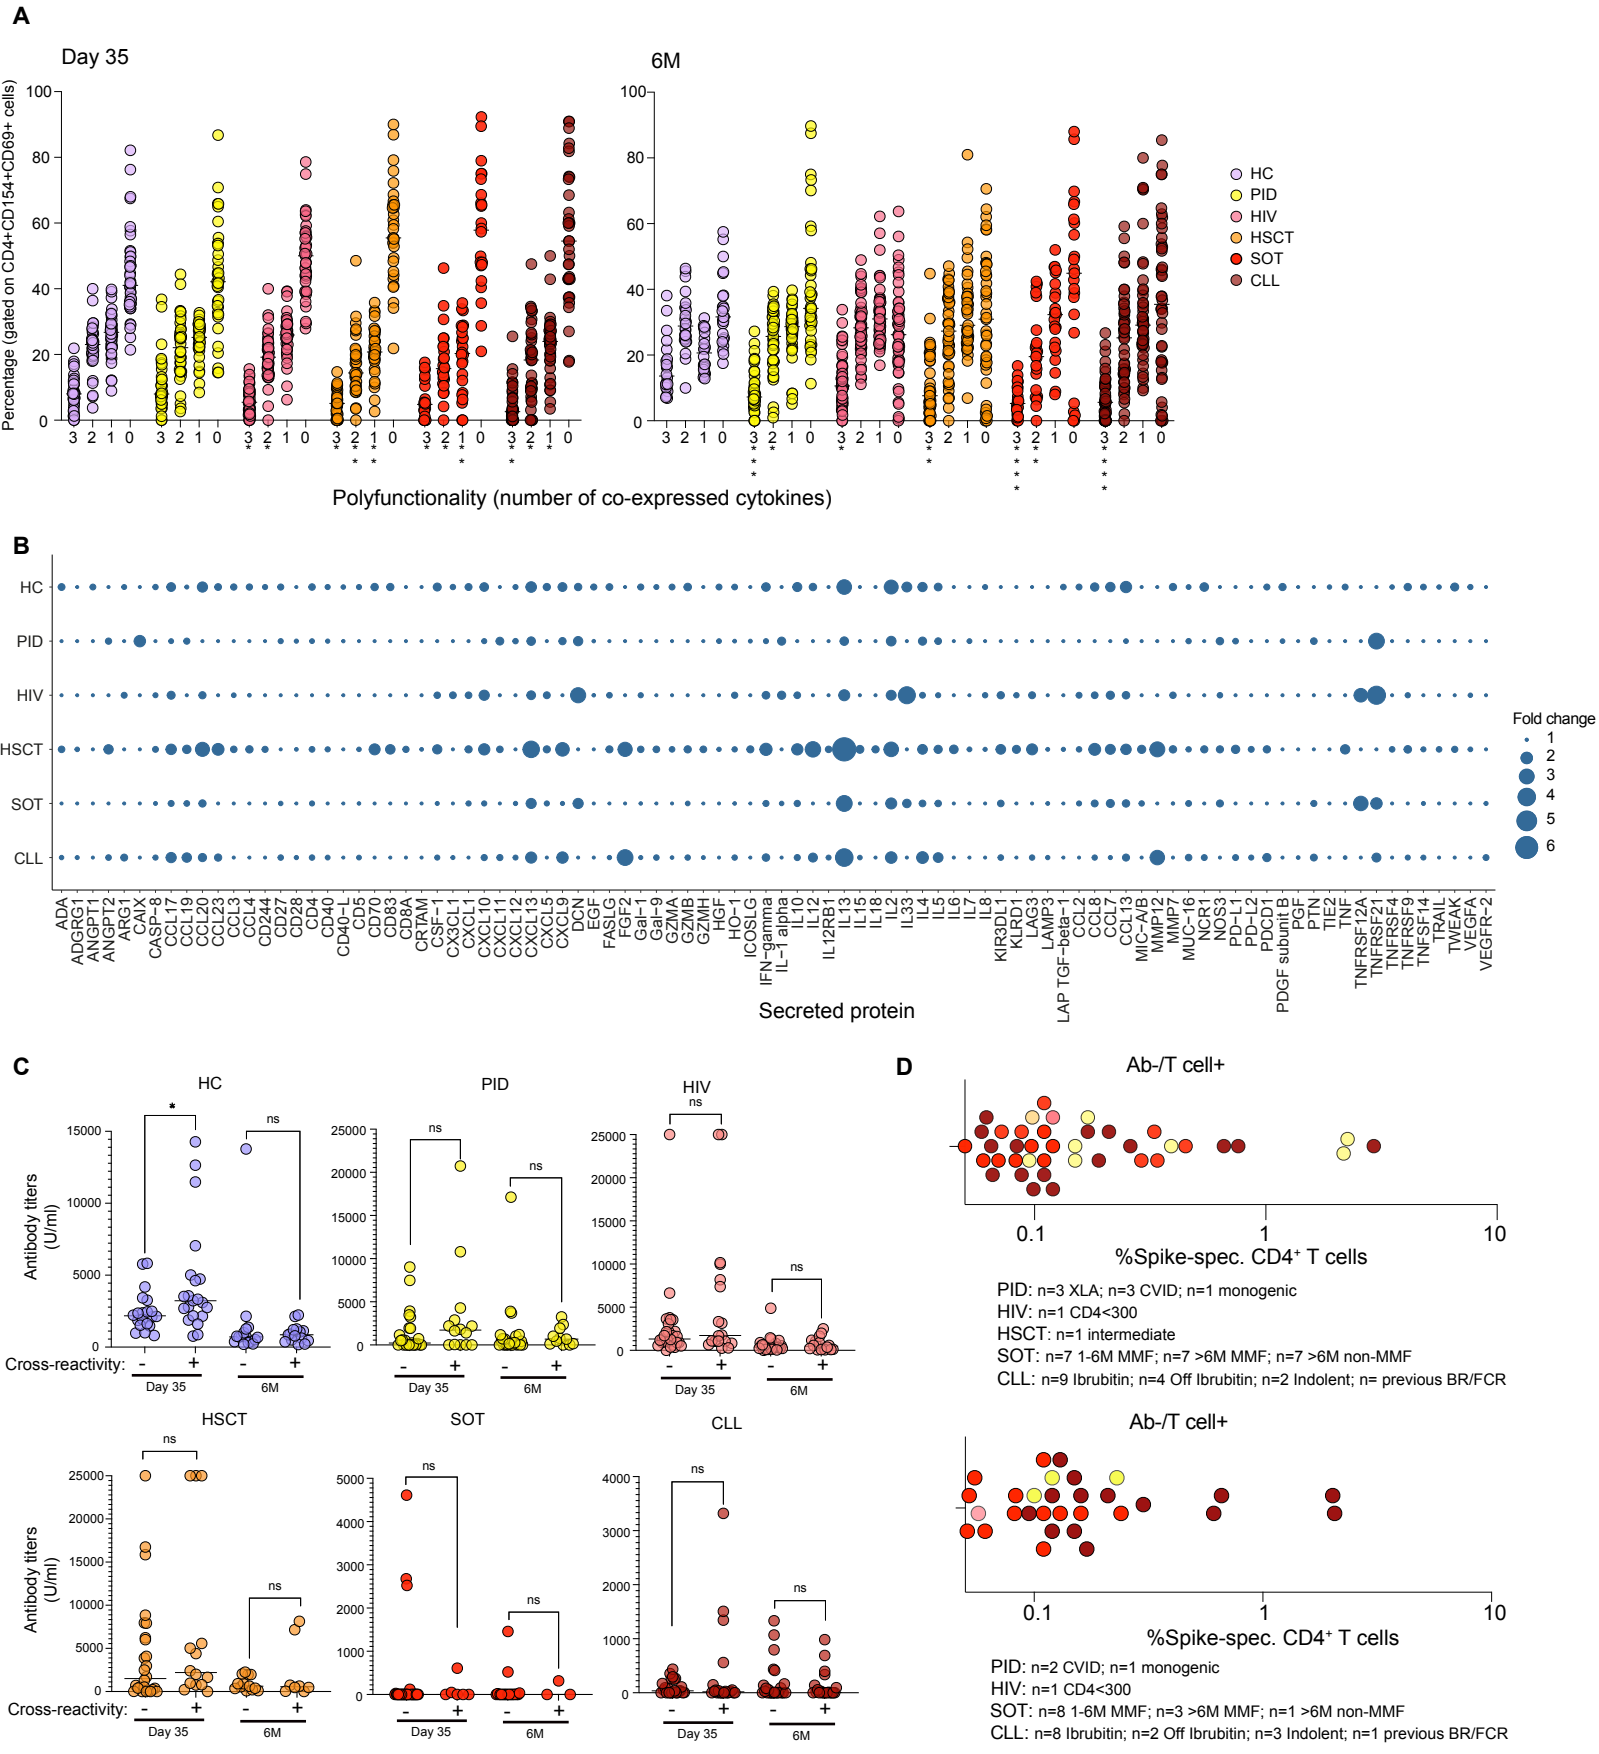

**Figure S3. Spike-specific T cells' polyfunctional profile and relationship with antibodies titers after mRNA, Related to Figures 2 and 3.** (A) Polyfunctional cytokine profile of AIM+ CD4 T cells after spike peptide pool stimulation based on number of co-expressed cytokines at Day 35 and 6M. Graph shows median values. Pairwise Mann-Whitney comparisons were performed between the same timepoints for each group against HC only. \* $p < 0.05$ , \*\* $p < 0.01$ , \*\*\* $p < 0.001$ , \*\*\*\* $p < 0.0001$ . (B) Bubble plot of secretome fold change at Day 35 when compared to unstimulated background. Proteins with lower expression after stimulation (fold change  $< 1$ ) were treated as unchanged (fold change = 1) for visualization. (C) Spike-specific antibody titers at Day 35 and 6M based on the presence or absence of pre-existing Day 0 CD4<sup>+</sup> T cell responses. (D) Frequency of spike-specific CD4<sup>+</sup> T cell responses in individuals without detectable spike-specific antibodies at Day 35 and 6M.

**Figure S4**

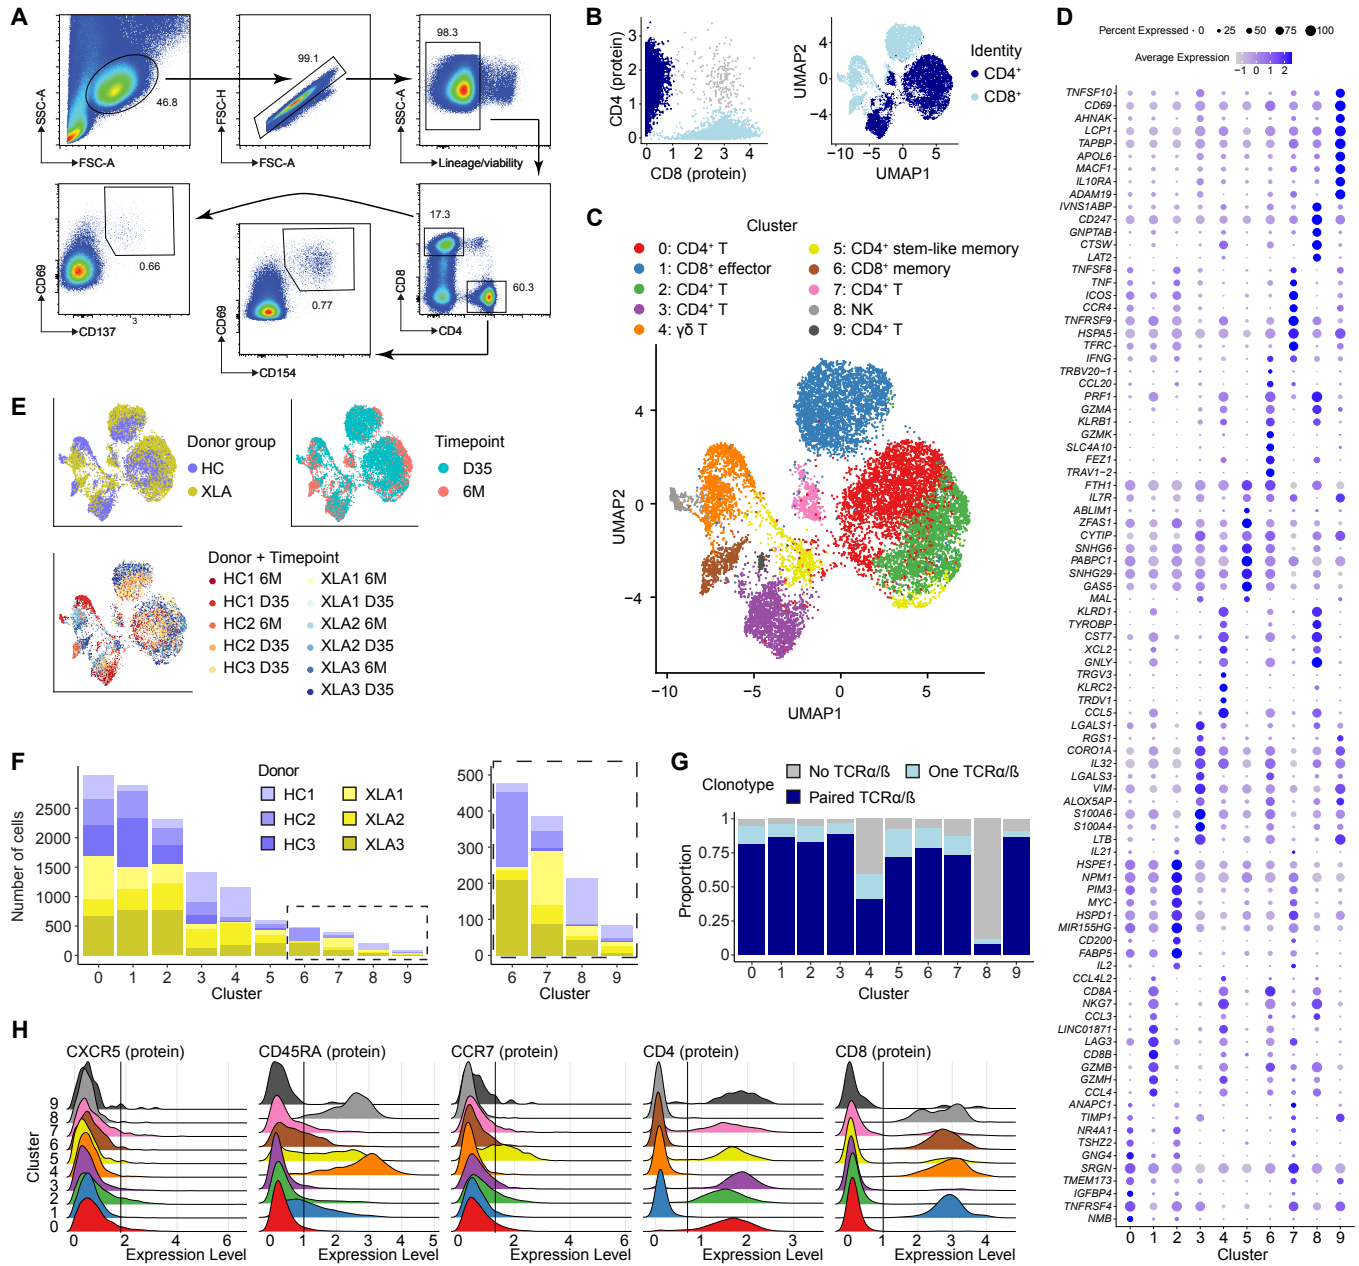

**Figure S4. Single-cell analysis of post-vaccination T cell responses, Related to Figures 4 and 5.** (A) Sorting strategy for the isolation of spike-specific T cells for single-cell sequencing. (B) Scatter plot and UMAP visualization of cells assigned the CD4 or CD8 expressing subset. Doublets are colored in grey. (C) UMAP visualization of all sequenced cells and clustered by the Louvain method. (D) Dot plot of the top marker genes for each cluster. (E) UMAP visualizations of cells colored according to donor group, timepoint or combined. (F) Stacked barplot of the contribution of each donor to each cluster. (G) Stacked barplot of the proportion of cells with any successfully reconstructed TCR CDR3 sequences. (H) Ridge plots of protein expression measured by antibody-derived tags.



**Figure S5**

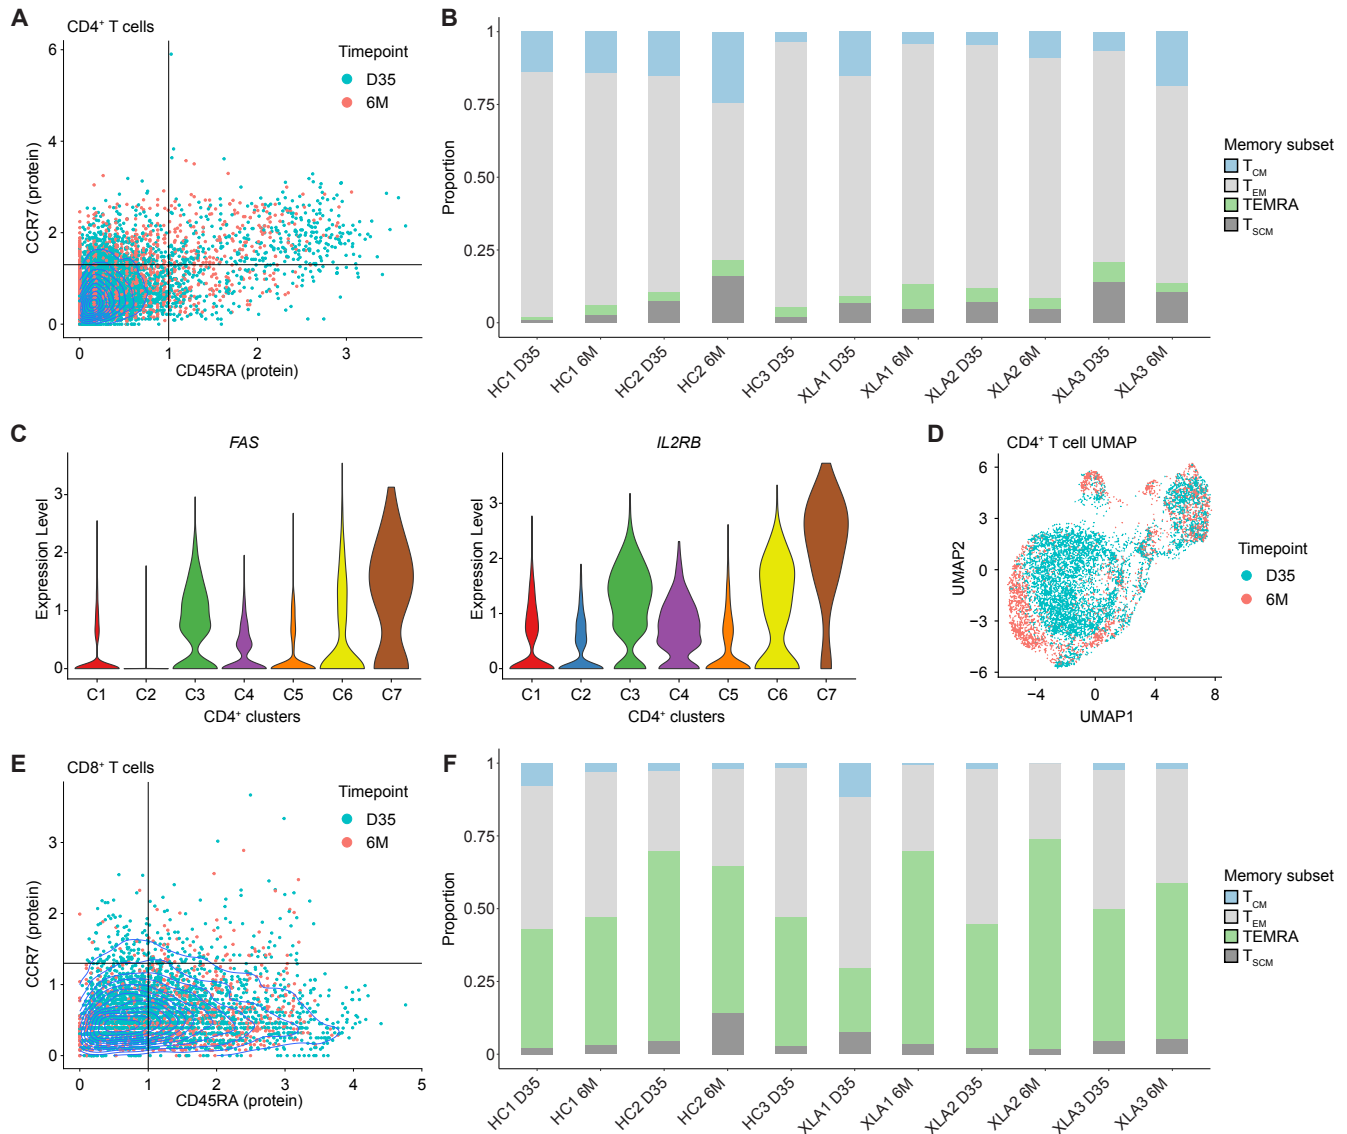

**Figure S5. Memory subset composition of post-vaccination T cell responses, Related to Figures 4 and 5.** (A) Scatterplot of CD45RA and CCR7 protein expression by CD4<sup>+</sup> T cells colored by timepoint. Lines indicate thresholds between negative and positive expression. (B) Stacked barplots of the CD4<sup>+</sup> T cell memory composition for each donor and timepoint. (C) Violin plots of gene expression in each CD4 cluster. (D) UMAP visualization for the timepoint of origin of CD4<sup>+</sup> T cells. (E) Scatterplot of CD45RA and CCR7 protein expression by CD8<sup>+</sup> T cells colored by timepoint. Lines indicate thresholds between negative and positive expression. (F) Stacked barplots of the CD8<sup>+</sup> T cell memory composition for each donor and timepoint.

**Figure S6**

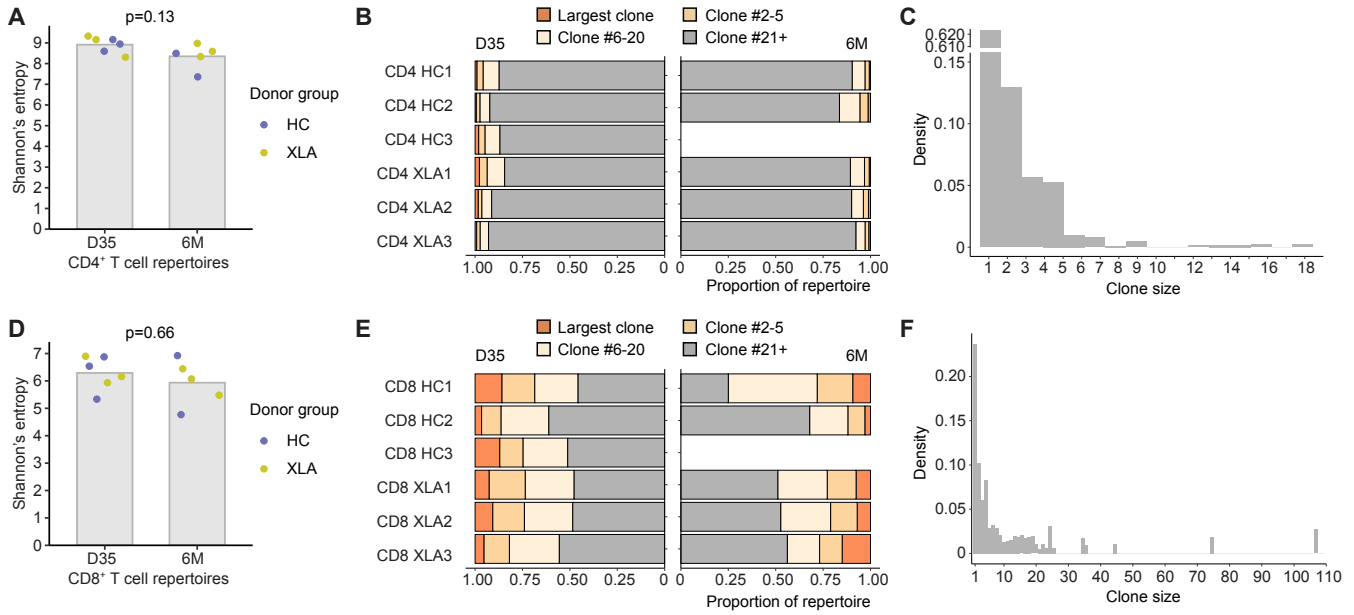

**Figure S6. Repertoire characteristics of spike-specific CD4<sup>+</sup> and CD8<sup>+</sup> T cells after mRNA vaccination, Related to Figures 4 and 5.** (A) Barplot of the diversity of each donor/timepoint CD4<sup>+</sup> T-cell repertoire measured by Shannon's entropy. (B) Stacked barplot of the repertoire occupied by CD4<sup>+</sup> T cell clones ordered by size. (C) Density plot of the size of each CD4<sup>+</sup> T cell clone from all donors and timepoints. (D) Barplot of the diversity of each donor/timepoint CD8<sup>+</sup> T-cell repertoire measured by Shannon's entropy. (E) Stacked barplot of the repertoire occupied by CD8<sup>+</sup> T cell clones ordered by size. (F) Density plot of the size of each CD8<sup>+</sup> T cell clone from all donors and timepoints.

**Table S1. Clinical information about each study subgroup. Related to Figures 1 and 2.**

| <b>Group</b> | <b>Subgroup</b>                     | <b>Medical treatment</b>                                                                                |
|--------------|-------------------------------------|---------------------------------------------------------------------------------------------------------|
| HC           | 18-39yrs                            | -                                                                                                       |
|              | 40-59yrs                            | -                                                                                                       |
|              | > 60yrs                             | -                                                                                                       |
| PID          | CVID                                | -                                                                                                       |
|              | XLA                                 | -                                                                                                       |
|              | CD4 cytopenia                       | -                                                                                                       |
|              | Monogenic diseases                  | -                                                                                                       |
|              | Other with expected normal response | -                                                                                                       |
| HIV          | nCD4 $\leq$ 300/mm <sup>3</sup>     | -                                                                                                       |
|              | nCD4 > 300/mm <sup>3</sup>          | -                                                                                                       |
| HSCT         | Early                               | <6 months after transplantation                                                                         |
|              | Intermediate                        | 6-12 months after transplantation                                                                       |
|              | Late                                | >12 months after transplantation                                                                        |
| SOT          | < 6 mo MMF                          | <6 months after transplantation with mycophenolate mofetil                                              |
|              | $\geq$ 6 mo MMF                     | $\geq$ 6 months after transplantation with mycophenolate mofetil                                        |
|              | $\geq$ 6 mo Non-MMF                 | $\geq$ 6 months after transplantation no mycophenolate mofetil                                          |
| CLL          | Ibrutinib                           | ongoing ibrutinib treatment                                                                             |
|              | Previous BR/FCR                     | previous treatment with BR/FCR bendamustine and rituximab / fludarabine, cyclophosphamide and rituximab |
|              | Indolent                            | indolent and not treated                                                                                |
|              | Off Ibrutinib                       | off ibrutinib treatment for >2 months                                                                   |

**Table S2. List of individuals with detectable T-cell responses in the absence of antibody responses after vaccination. Related to Figure 3.**

| <b>Group</b> | <b>ID</b> | <b>AIM<sup>+</sup> CD4<sup>+</sup> T cells at Day35<br/>(% of CD4<sup>+</sup> T cells)</b> | <b>Ab titer at<br/>Day 35 (U/ml)</b> | <b>Subgroup info</b> |
|--------------|-----------|--------------------------------------------------------------------------------------------|--------------------------------------|----------------------|
| PID          | WP1138    | 2.26                                                                                       | 0.4                                  | CVID                 |
|              | WP1114    | 0.15                                                                                       | 0.4                                  | XLA                  |
|              | WP1109    | 0.39                                                                                       | 0.4                                  | XLA                  |
|              | WP1111    | 0.095                                                                                      | 0.4                                  | Monogenic diseases   |
|              | WP1102    | 0.17                                                                                       | 0.4                                  | CVID                 |
|              | WP1105    | 0.15                                                                                       | 0.4                                  | CVID                 |
|              | WP1103    | 2.17                                                                                       | 0.4                                  | XLA                  |
| HIV          | WP2104    | 0.12                                                                                       | 0.4                                  | ≤CD4 300             |
| H SCT        | WP3168    | 0.098                                                                                      | 0.4                                  | Intermediate         |
| SOT          | WP4135    | 0.34                                                                                       | 0.4                                  | > 6 mon MMF          |
|              | WP4139    | 0.12                                                                                       | 0.4                                  | > 6 mon MMF          |
|              | WP4141    | 0.072                                                                                      | 0.4                                  | > 6 mon MMF          |
|              | WP4111    | 0.06                                                                                       | 0.4                                  | 1-6 mo MMF           |
|              | WP4117    | 0.11                                                                                       | 0.4                                  | > 6 mon MMF          |
|              | WP4118    | 0.097                                                                                      | 0.4                                  | 1-6 mo MMF           |
|              | WP4119    | 0.07                                                                                       | 0.44                                 | 1-6 mo MMF           |
|              | WP4122    | 0.33                                                                                       | 0.4                                  | 1-6 mo MMF           |
|              | WP4123    | 0.11                                                                                       | 0.4                                  | 1-6 mo MMF           |
|              | WP4124    | 0.45                                                                                       | 0.4                                  | > 6 mon MMF          |
|              | WP4125    | 0.29                                                                                       | 0.4                                  | > 6 mon MMF          |
|              | WP4126    | 0.083                                                                                      | 0.4                                  | 1-6 mo MMF           |
|              | WP4128    | 0.11                                                                                       | 0.4                                  | > 6 mon MMF          |
|              | WP4101    | 0.088                                                                                      | 0.4                                  | > 6 mon non-MMF      |
|              | WP4102    | 0.05                                                                                       | 0.4                                  | 1-6 mo MMF           |
| CLL          | WP5129    | 0.17                                                                                       | 0.4                                  | Off Ibrutinib        |
|              | WP5132    | 0.099                                                                                      | 0.4                                  | Ibrutinib            |
|              | WP5119    | 0.084                                                                                      | 0.4                                  | Ibrutinib            |
|              | WP5120    | 0.088                                                                                      | 0.4                                  | Off Ibrutinib        |
|              | WP5121    | 0.059                                                                                      | 0.4                                  | Ibrutinib            |
|              | WP5122    | 2.93                                                                                       | 0.4                                  | Off Ibrutinib        |
|              | WP5123    | 0.066                                                                                      | 0.4                                  | Ibrutinib            |
|              | WP5126    | 0.21                                                                                       | 0.4                                  | Ibrutinib            |
|              | WP5136    | 0.19                                                                                       | 0.4                                  | Indolent             |
|              | WP5137    | 0.76                                                                                       | 0.4                                  | Off Ibrutinibtinib   |

|  |        |       |     |                 |
|--|--------|-------|-----|-----------------|
|  | WP5145 | 0.062 | 0.4 | Previous BR/FCR |
|  | WP5104 | 0.12  | 0.4 | Ibrutinib       |
|  | WP5107 | 0.11  | 0.4 | Ibrutinib       |
|  | WP5112 | 0.065 | 0.4 | Ibrutinib       |
|  | WP5152 | 0.26  | 0.4 | Ibrutinib       |
|  | WP5153 | 0.66  | 0.4 | Ibrutinib       |

**Table S3. Cell metrics for cells selected for single-cell sequencing. Related to Figures 4 and 5.**

| ID            | Timepoint | Antibody Titre (U/ml) | Flow cytometry            |                           | Sequenced cells passing QC |                          |
|---------------|-----------|-----------------------|---------------------------|---------------------------|----------------------------|--------------------------|
|               |           |                       | % SARS-CoV-2 specific CD4 | % SARS-CoV-2 specific CD8 | CD4 <sup>+</sup> T cells   | CD8 <sup>+</sup> T cells |
| WP6127 (HC1)  | Day 35    | 5564                  | 0.59                      | 0.33                      | 726                        | 184                      |
| WP6133 (HC2)  | Day 35    | 5775                  | 0.85                      | 1.63                      | 781                        | 468                      |
| WP6173 (HC3)  | Day 35    | 973                   | 0.77                      | 1.53                      | 996                        | 839                      |
| WP1103 (XLA1) | Day 35    | 0.4                   | 0.77                      | 0.66                      | 697                        | 283                      |
| WP1109 (XLA2) | Day 35    | 0.4                   | 0.66                      | 0.63                      | 803                        | 413                      |
| WP1114 (XLA3) | Day 35    | 0.4                   | 1.17                      | 2.34                      | 1037                       | 761                      |
| WP6127 (HC1)  | 6 months  | 966                   | 0.34                      | 0.021                     | 452                        | 34                       |
| WP6133 (HC2)  | 6 months  | 2146                  | 0.42                      | 0.27                      | 242                        | 155                      |
| WP1103 (XLA1) | 6 months  | 154                   | 1.15                      | 1.55                      | 594                        | 202                      |
| WP1109 (XLA2) | 6 months  | 473                   | 0.3                       | 0.12                      | 378                        | 114                      |
| WP1114 (XLA3) | 6 months  | 8.23                  | 0.71                      | 0.25                      | 695                        | 320                      |
